# Supplementary material
Source: PubMed Central journal article supplement (PMC8532373)
Supplement: mmc1.pdf [file mmc1.pdf]

## Supplementary Data

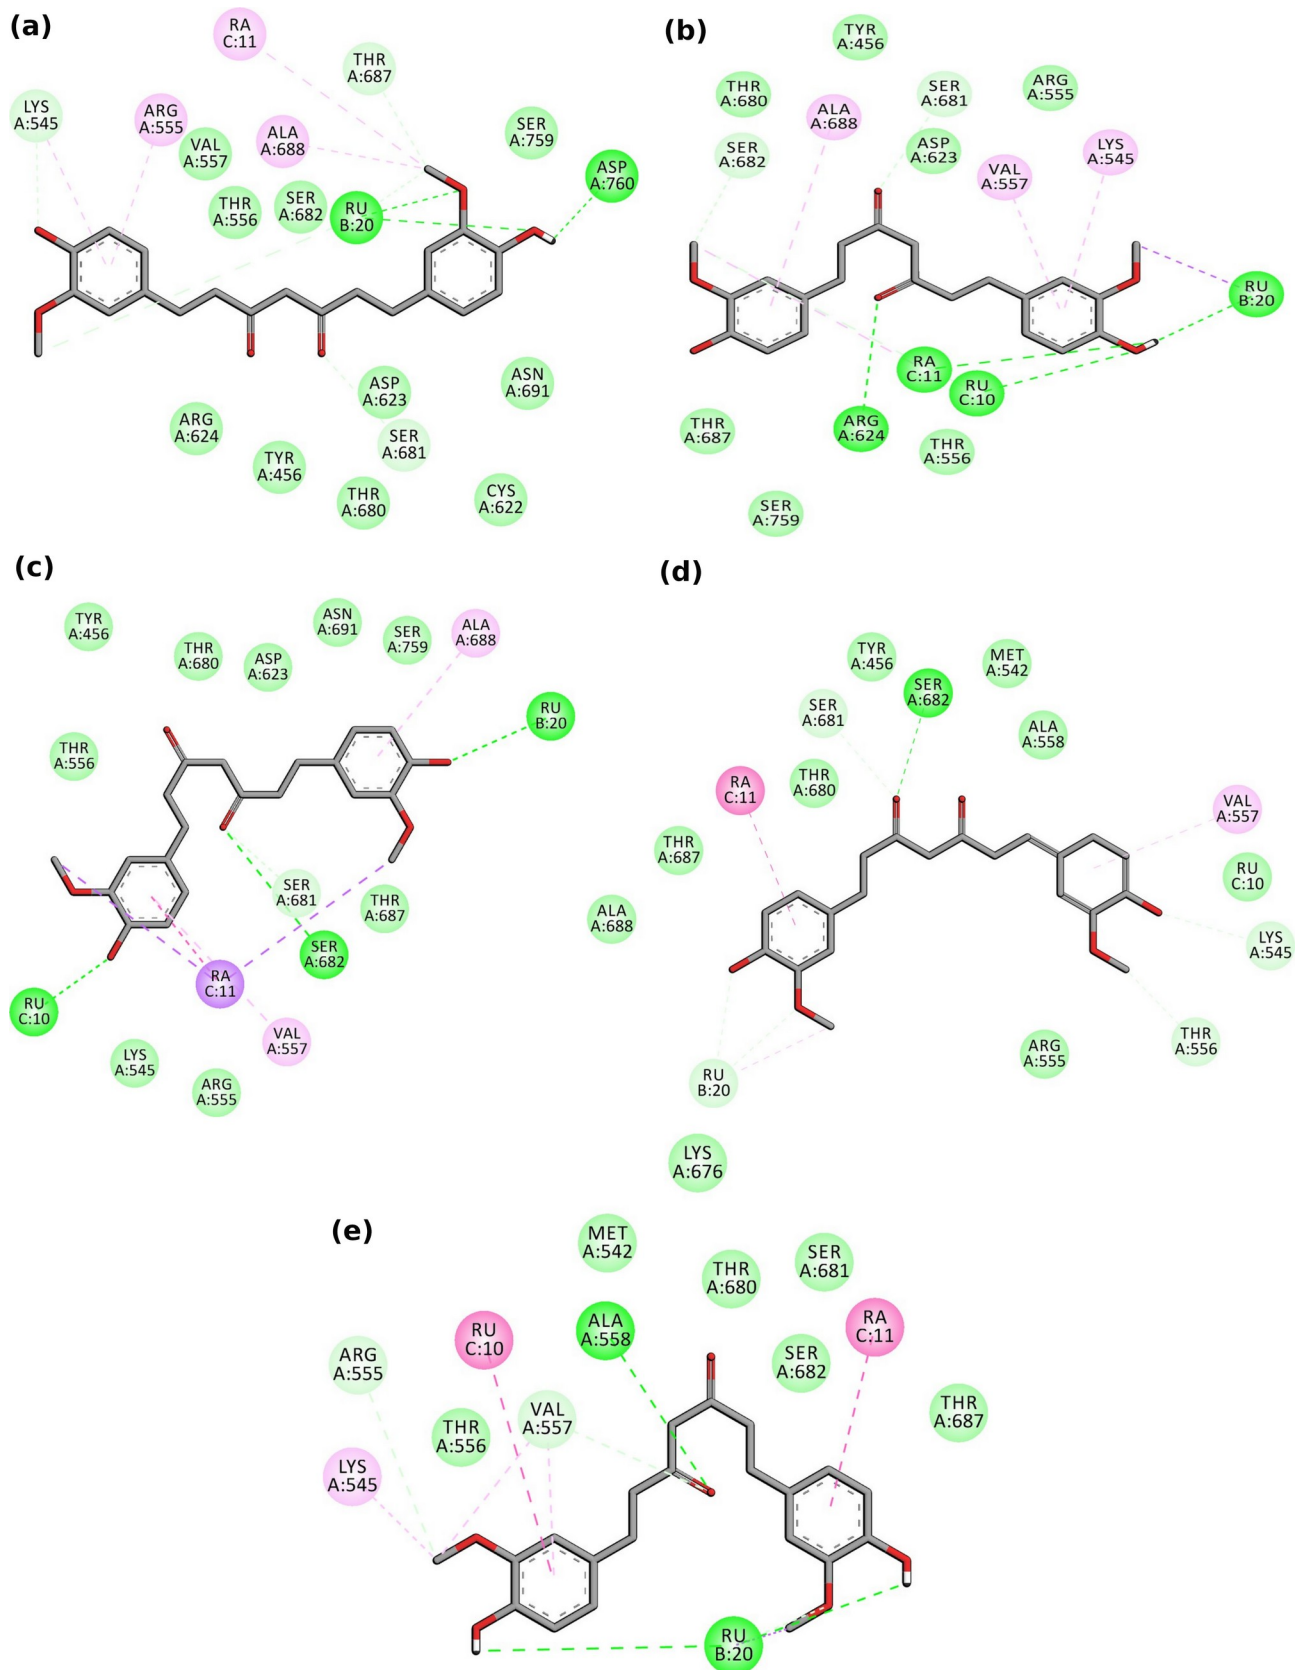

**Figure S1.** Molecular docking 2D interaction poses of the RdRp-RNA of SARS-CoV-2 in complex with curcumin at different time intervals. (a) 5 ns, (b) 25 ns, (c) 50 ns, (d) 75 ns, and 100 ns.

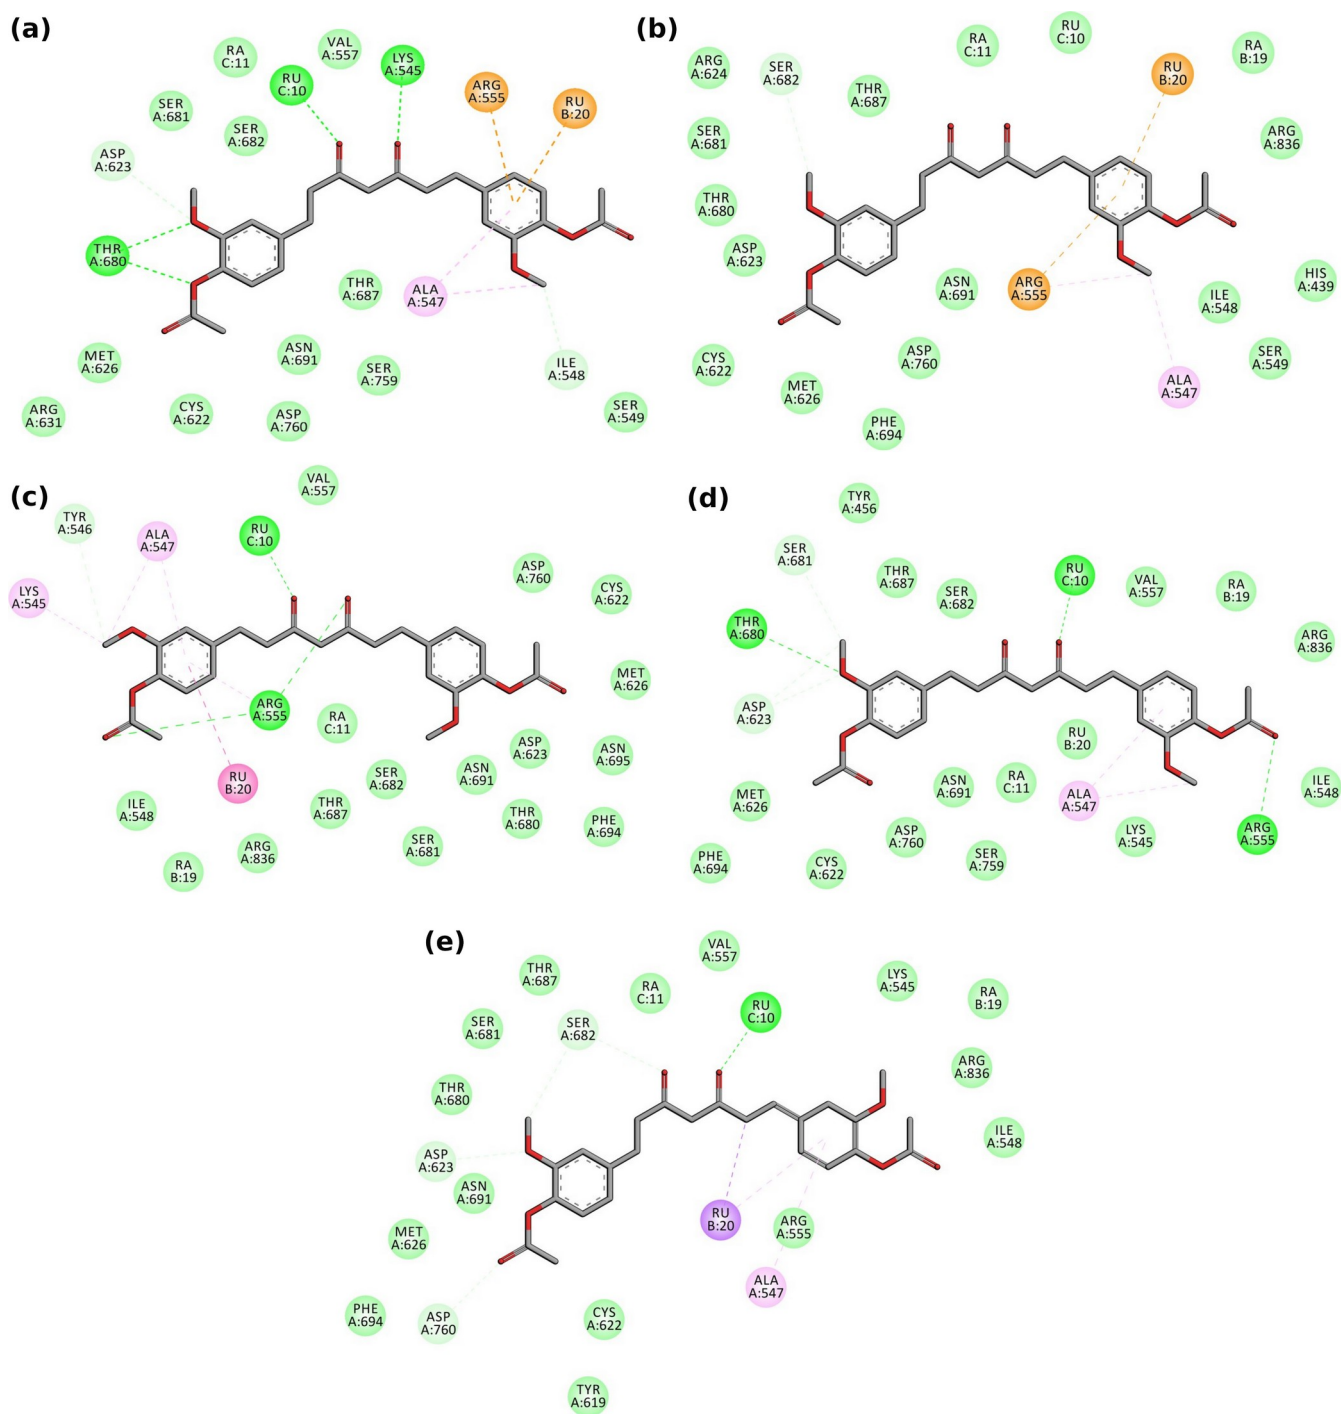

**Figure S2.** Molecular docking 2D interaction poses of the RdRp-RNA of SARS-CoV-2 in complex with diacetylcurcumin at different time intervals. (a) 5 ns, (b) 25 ns, (c) 50 ns, (d) 75 ns, and 100 ns.

**Table S1.** Comparative binding free energy in individual terms for FDA-approved drugs and selected compounds bound to RdRp-RNA generated by MM-PBSA method.

| S. No. | RdRp-RNA-Ligand Complexes | $\Delta E_{\text{binding}}$<br>(kJ/mol) | $\Delta E_{\text{polar solvation}}$<br>(kJ/mol) | SASA<br>(kJ/mol) | $\Delta E_{\text{Electrostatic}}$<br>(kJ/mol) | $\Delta E_{\text{Van der Waals}}$ (kJ/mol) |
|--------|---------------------------|-----------------------------------------|-------------------------------------------------|------------------|-----------------------------------------------|--------------------------------------------|
| 1.     | RdRp-curcumin             | -42.162                                 | 101.798                                         | -13.496          | -18.137                                       | -112.327                                   |
| 2.     | RdRp-diacetylcurcumin     | -71.964                                 | 116.315                                         | -19.107          | -14.698                                       | -154.474                                   |
| 3.     | <b>RdRp-Remdesivir</b>    | <b>107.346</b>                          | <b>437.201</b>                                  | <b>-12.356</b>   | <b>-248.406</b>                               | <b>-69.093</b>                             |
| 4.     | <b>RdRp-Favipiravir</b>   | <b>248.378</b>                          | <b>977.029</b>                                  | <b>-12.653</b>   | <b>-657.208</b>                               | <b>-58.790</b>                             |
| 5.     | RNA-curcumin              | -40.306                                 | 27.351                                          | -6.539           | -11.487                                       | -49.631                                    |
| 6.     | RNA-diacetylcurcumin      | -80.718                                 | 31.556                                          | -8.498           | -31.535                                       | -72.242                                    |
| 7.     | <b>RNA-Favipiravir</b>    | <b>2091.712</b>                         | <b>-18.286</b>                                  | <b>-6.780</b>    | <b>2168.615</b>                               | <b>-51.572</b>                             |
| 8.     | <b>RNA-Remdesivir</b>     | <b>1311.862</b>                         | <b>-30.025</b>                                  | <b>-7.045</b>    | <b>1387.624</b>                               | <b>-40.383</b>                             |
